# Supplementary material for: Glycyrrhizic Acid Inhibits High-Mobility Group Box-1 and Homocysteine-Induced Vascular Dysfunction
Source: MDPI journal article supplement (doi:10.3390/nu15143186), 2023-07-18
Supplement: s1 [file s1]

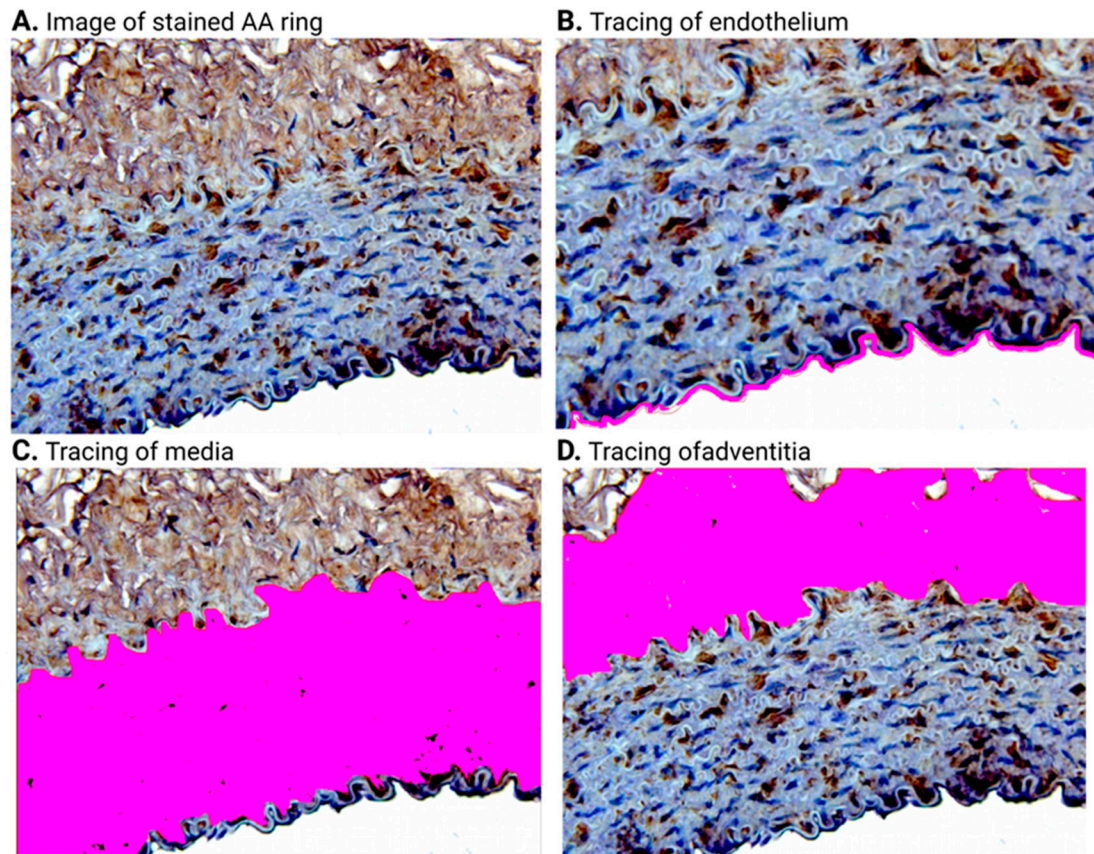

**Supplementary Figure S1: Identification of different vascular layers.** A. Image of AA coronal section from a rabbit fed our 4-week AD. B. Image that has been traced using the MCID program ribbon tool and is highlighting the endothelium (depicted by magenta color). C. Image that has been traced using the MCID program outline tool and is highlighting the media layer (depicted in magenta). D. Image that has been traced using the MCID program outline tool and is highlighting the adventitia layer (depicted in magenta). *Abbreviations: AA, abdominal aorta; AD, atherogenic diet.*
